# Supplementary material for: Global dataset of thermohaline staircases obtained from Argo floatsand Ice Tethered Profilers
Source: Copernicus journal article supplement (doi:10.5194/essd-2020-197), 2020-08-11
Supplement: Supplementary file [file essd-2020-197-AC3-supplement.pdf]

*We would like to thank the reviewer for the time and effort spent reading our manuscript, and for the comments which have improved the manuscript significantly. A detailed response to all comments can be found below, where the blue text indicates our response to the reviewers' comments, which are denoted in black. Line numbers correspond to the revised manuscript.*

**Comments by the reviewer:**

This paper describes the creation of a novel dataset to study thermohaline staircases in the ocean. It is a great example of how something new can be brought out of a widely-used dataset through a suitable data processing technique. The data processing is careful and well documented, and compares favorably against earlier regional studies. In particular, Figure 5 is impressive, where the authors appear to capture the salt-fingering and double-diffusive convection regimes based on the application of their straightforward criteria. The dataset created by the authors is quite unique and will undoubtedly be of use to others, particularly since it is distributed together with the software. I believe it should be published with minor revisions.

There are a few points I would like the authors to address.

– What is the estimated precision of the salinity, temperature, and density measurements, and how does this compare with typical step sizes? I ask because, if the precisions are coarse, or upstream rounding or truncation has been applied, a jump-like effect mimicking staircases could arise as an artifact. Here I think it is important to explicitly examine the measurement precisions and noise levels to rule out this possibility, rather than to simply argue that the final product seems to be physically meaningful.

*The accuracy of a temperature measurement in an Argo float or Ice-Tethered Profiler is 0.001°C; for salinity this is 0.001 psu. These errors are much smaller than typical temperature and salinity differences characterizing staircases and hence roundoff due to measurement error does not play a role in step detection.*

– As the software is an important part of this contribution, I think it should be described in more detail, with language, license, and function or function names listed, together with a description of how the software is to be used and possibly listing inputs and outputs. It is important that the software is arranged as a function or functions rather than as a script, if it is to be useful to others.

*We thank the reviewer for this suggestion. We added a figure with the structure of the software and a table with the separate functions of the software (Table A2). The figure with the structure of the software is also added at the end of this reply. We have added the license and language at the code availability.*

*Lines 281-284:*

*'Both algorithm and global dataset are available at doi: <https://doi.org/10.5281/zenodo.4286170> (van der Boog et al., 2020). The algorithm is written in Python3 and is available under the Creative Commons Attribution 4.0 License. More details on the functions and output of the algorithm are depicted in Table A1 and Table A2, respectively. The structure of the algorithm is displayed in Figure A4. '*

–I find it conspicuous that, zooming on on Fig. 6a, I see a lot of staircases that appear to have been missed, lying just above the blue curves showing detections. Please discuss these and whether or not they are ‘false negatives’ that the method should detect but does not, and if they are then explain why such false negatives are acceptable.

*We agree with the reviewer that it is not entirely clear from Figure 7a why some mixed layers are missed by the algorithm. A small part of these mixed layers is missed due to the resolution of the original profiles. We have clarified this in the text.*

*Lines 224-226:*

*‘Due to the vertical resolution of the profiles and the design of the algorithm (recall that the mixed layers are separated from each other by removing the upper and lower datapoint of the mixed layer, Section 3.1), the method is not capable of detecting very thin interfaces (Figure A1).’*

*The other part of the mixed layers is missed because the algorithm detects thermohaline staircases not only using profiles of conservative temperature (as shown in Figure 7a), but also using potential density and absolute salinity. Therefore, it is not always clear from conservative temperature profiles why a step is disregarded. To be more transparent about this selection, we added 3 figures in the Appendix of the revised paper with representative profiles of three well-known formation regions: the Arctic Ocean, the Mediterranean Sea, and the western tropical Atlantic Ocean. In these figures, we show the different steps of the algorithm. We also added the figures at the end of this reply.*

–The problem that the authors examine is a difficult one. I am not sure that the most elegant solution has been found, as it is dependent upon the choices of a number of free parameters. Ideally, one should not have to specify a prior cutoffs; it would be preferable for these to emerge from the data based on examining statistical distributions. However, a parameter-free version of this product would probably take a great deal of more work and possibly different methods (e.g., least squares fits, statistical tests, etc.), and it is much better to have a satisfactory solution than none at all.

*Yes, we agree with the reviewer. The algorithm mainly depends on the parameters to detect the mixed layers (Fig. 8). It would indeed be more elegant to remove all parameters from the algorithm, but this is outside the scope of this paper.*

Because the authors have thought a lot about this problem, they are in a good position to describe the shortfalls of the current method and how it might be improved in the future. This would be a great topic to discuss at the end of the paper.

*The major shortfall of the algorithm is the preprocessing of the data and, consequently, the vertical resolution. We now discuss this shortfall, and how to resolve it, in the revised text.*

*Lines 260-268:*

*‘We optimized the input of the algorithm such that it provides a global overview and limits the number of detected false positives. As a result, the regional verification in Section 5 indicated that the data pre-processing and data analysis have some limitations. For example, the vertical resolution of 1 dbar in the profiles is too coarse to capture all staircase steps in the Arctic Ocean. In the Mediterranean, the Argo*

*floats did not dive deep enough to capture the full depth of the staircase region. However, the fact that (i) the algorithm detects thermohaline staircases at realistic depth ranges, with (ii) conservative temperature and absolute salinity steps across the interfaces, 265 and in (iii) the same double-diffusive regime as previous studies (Table 3-Table 5), indicates that the algorithm itself performs well. Therefore, when considering an individual staircase region, we recommend optimizing the input variables of the algorithm for that specific region and applying the algorithm on additional data, for example high-resolution CTD or microstructure profiles, where available.'*

Minor comments

p 1, first paragraph, and p 2 line 31, "double-diffusive" should be hyphenated

*Corrected throughout the manuscript. Following the same grammar rule, we replaced Ice Tethered Profilers by Ice-Tethered Profilers.*

p 1, line 14, "two orders of magnitude"

*Corrected (line 13).*

p 1, line 17, and p 5, line 93, "of the order"

*Corrected (line 16, line 106).*

p 1, line 19, "the the"

*Corrected (line 24).*

p 2, line 35, would recommend present tense

*We agree, we changed the tense.*

p 2, line 47, what is the gray list and where can it be found?

*The gray list is a list of Argo floats that have problems with one or more sensors. We have mentioned this in the revised manuscript:*

*Lines 51-53:*

*'First a quality check is performed, where a profile is excluded from analysis if it was taken by an Argo float mentioned on the grey list. This grey list contains floats that may have problems with at least one of the sensors ([https://www.nodc.noaa.gov/argo/grey\\_floats.htm](https://www.nodc.noaa.gov/argo/grey_floats.htm)).'*

p 3, line 57, this is a second moving average, yes?

*No, this is a first moving average, instead of the 200 dbar. We have clarified this in the text.*

*Lines 67-68:*

*'The Turner angle is computed using profiles that were smoothed with a moving average of 50 dbar instead of 200 dbar'*

p 3, eqn 1, what is the meaning of the overbar?

*The overbar indicated that the temperature and salinity profiles were smoothed. We understand that this is unclear, and the overbar is not necessary. Therefore, we decided to remove the overbar from equation 1.*

p 4, lines 64, "the properties of any layer lying between" would be better

*We thank the reviewer for this suggestion. We rephrased the sentence:*

*Lines 78-79:*

*'Next, the properties of any layer lying between the mixed layers (the interfaces, IF, orange dots in Fig. 3) are assessed by applying a minimum in temperature and salinity variations.'*

p 4, lines 74,75, and 76, "criterium" should be "criterion"

*Corrected (lines 86, 87, and 90).*

p 7, I believe the first paragraph is unnecessarily repeated

*Yes, we agree. We have changed the first paragraph and removed all repetitions.*

*Lines 129-133:*

*'Furthermore, the tallest observed interfaces are found in the Mediterranean Sea with heights up to  $h_{IF} = 27$  m, where they separate mixed layers of over 100 m (Zodiatis and Gasparini, 1996; Radko, 2013). To prevent false detection of large vertical interfaces of up to hundreds of meters, we limit the interface height to  $h_{IF,max} = 27$  dbar (Table 2, Fig. 5b). This only affects the classification of 1 % of the interfaces (Fig. 5b).'*

p 10, where are these example profiles from?

*We have added a paragraph with more details on the profiles.*

*Lines 162-165:*

*'In line with previous results (Rudels, 2015), staircases in the diffusive-convective regime (Fig. 7a) are mainly detected on the thermocline with the conservative temperature increasing with depth. These staircases are predominantly located in the Arctic Ocean at a depth between 300-400 m, which is between the warm and saline Atlantic Water and cold and fresh surface waters (Rudels, 2015).'*

*Lines 175-178:*

*'Thermohaline staircases with a high number of steps in the salt-finger regime are detected on the main thermocline where the conservative temperature decreases with depth (Fig. 7b). Compared to the staircases in the diffusive-convective regime, these staircases are located slightly deeper at 400-700 m. While the locations of these staircases vary, they are located above the cold and fresh Antarctic Intermediate Water, which is observed below 700 m (Tsuchiya, 1989; Fine, 1993; Talley, 1996).'*

p 11 "optimalization" should be "optimization"

*Corrected (line 213).*

p 13, line 219–220, I am not sure what is being meant here. It seems a lot of physical assumptions have been made that are implicit in the parameter choices.

*We meant that we, in contrast to previous detection algorithms, do not select on the Turner angle. We rephrased the sentence:*

*Lines 257-258:*

*'Note that by formulating the algorithm solely on this vertical structure of the staircases, we could use the Turner angle of the detected staircases for verification.'*

p 14, line 225 should say "both double-diffusive regimes" I believe Table A1, Julian should be capitalized and density should not be

*Corrected (line 270).*

Many of the references have incorrectly capitalized titles or journal names.

*Corrected.*

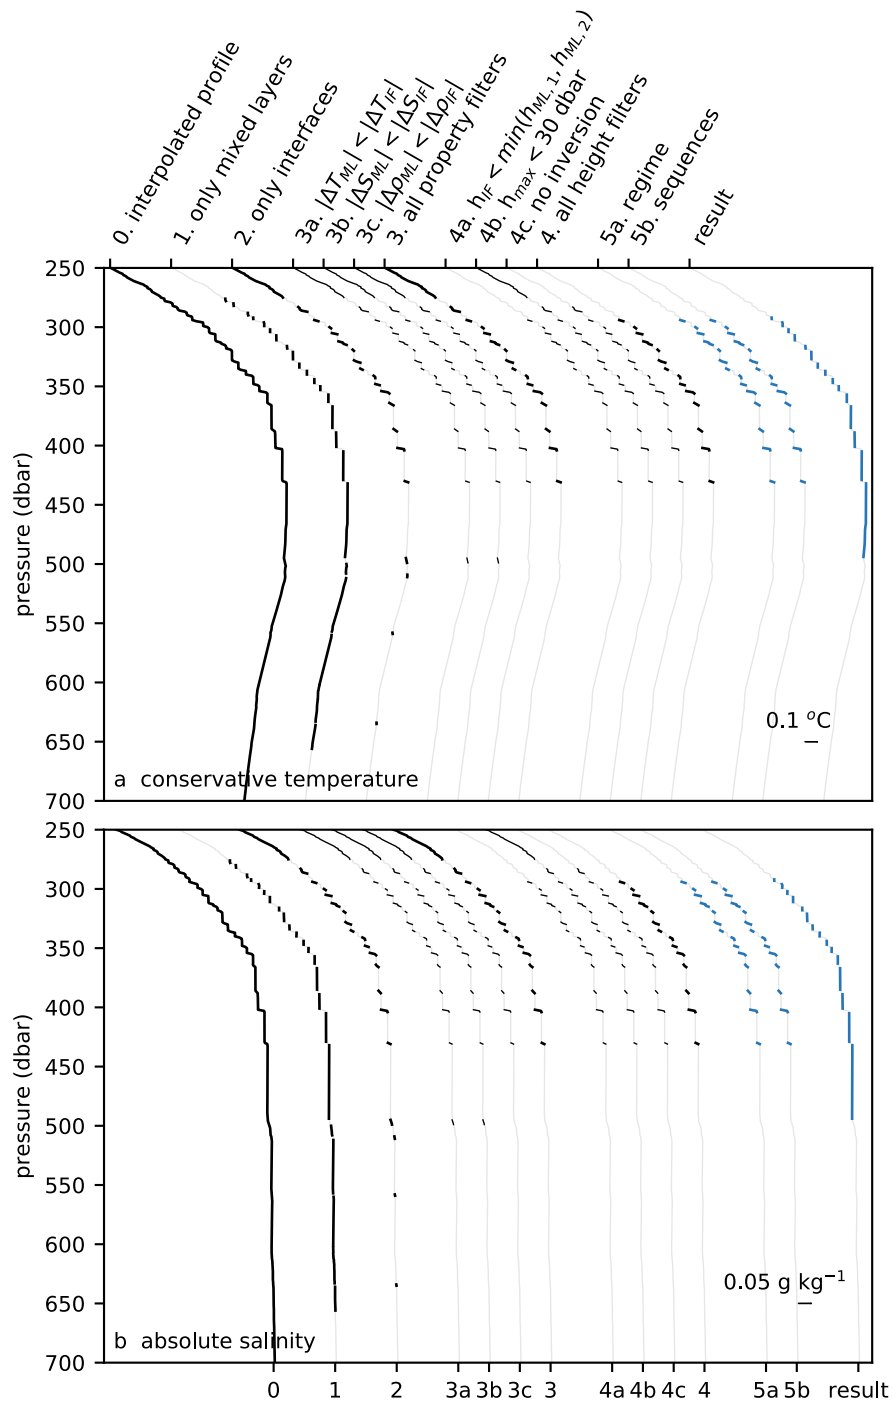

Figure A 1 Steps of the detection algorithm applied on a profile in the Arctic Ocean, where steps are indicated on separate (a) conservative temperature and (b) absolute salinity profiles. Each profile is shifted for clarity. Similar to Figures 3-5, an interface is not considered by the detection algorithm when the interface characteristics did not meet the requirements of a previous step. Original profile is taken from Ice-Tethered-Profiler ITP64 at 137.8°W and 75.2°N on 29 January 2013. The details of the pre-processing and the algorithm steps are discussed in Section 2 and Section 3, respectively.

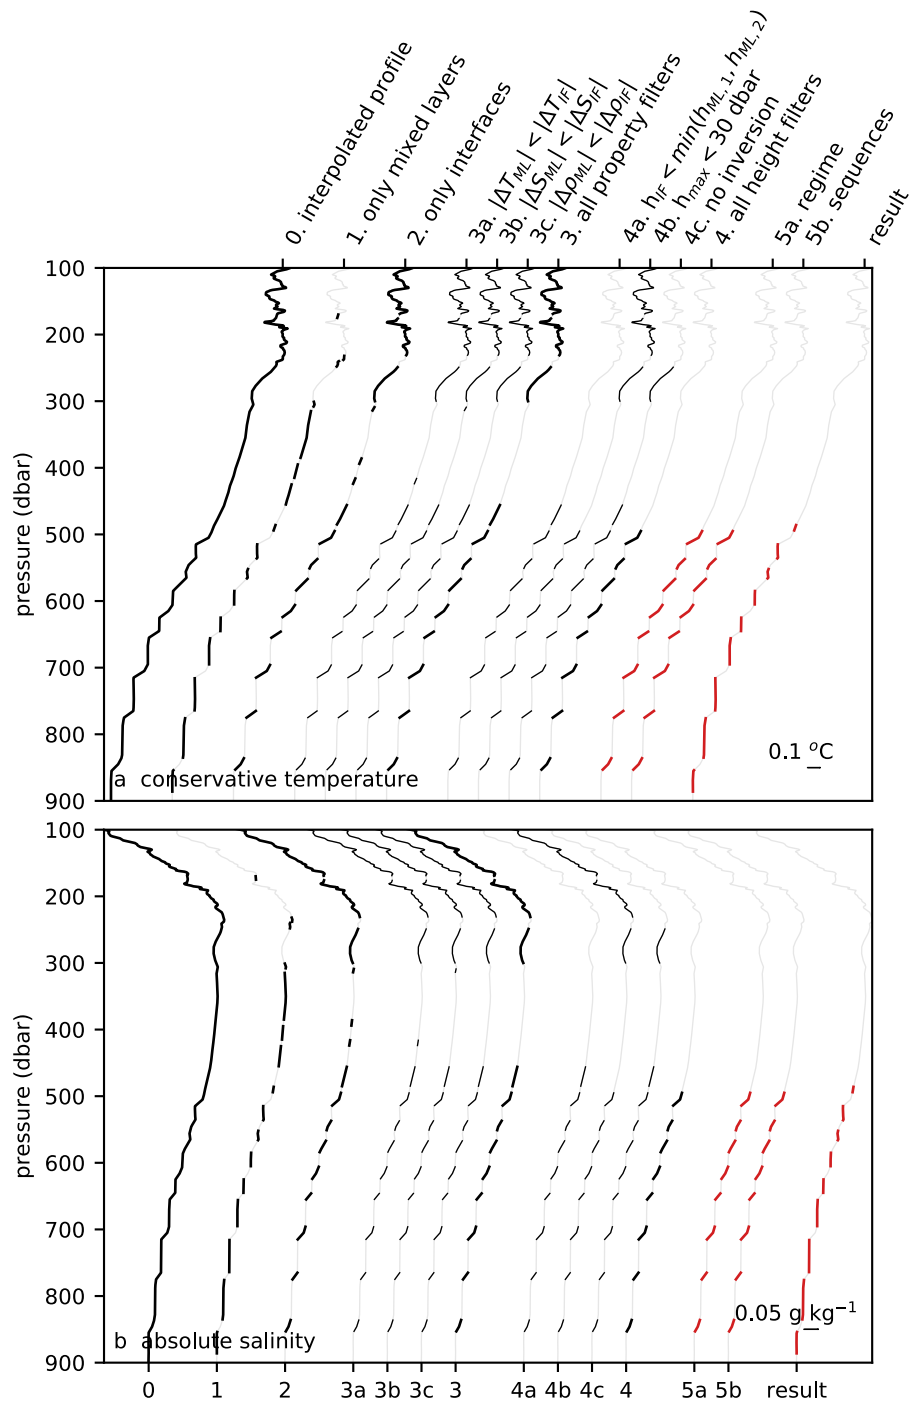

Figure A 2 as Figure A1, but for a profile in the Mediterranean Sea. Original profile is taken from Argo float 6901769 at 8.9°E and 37.9°N on 31 October 2017.

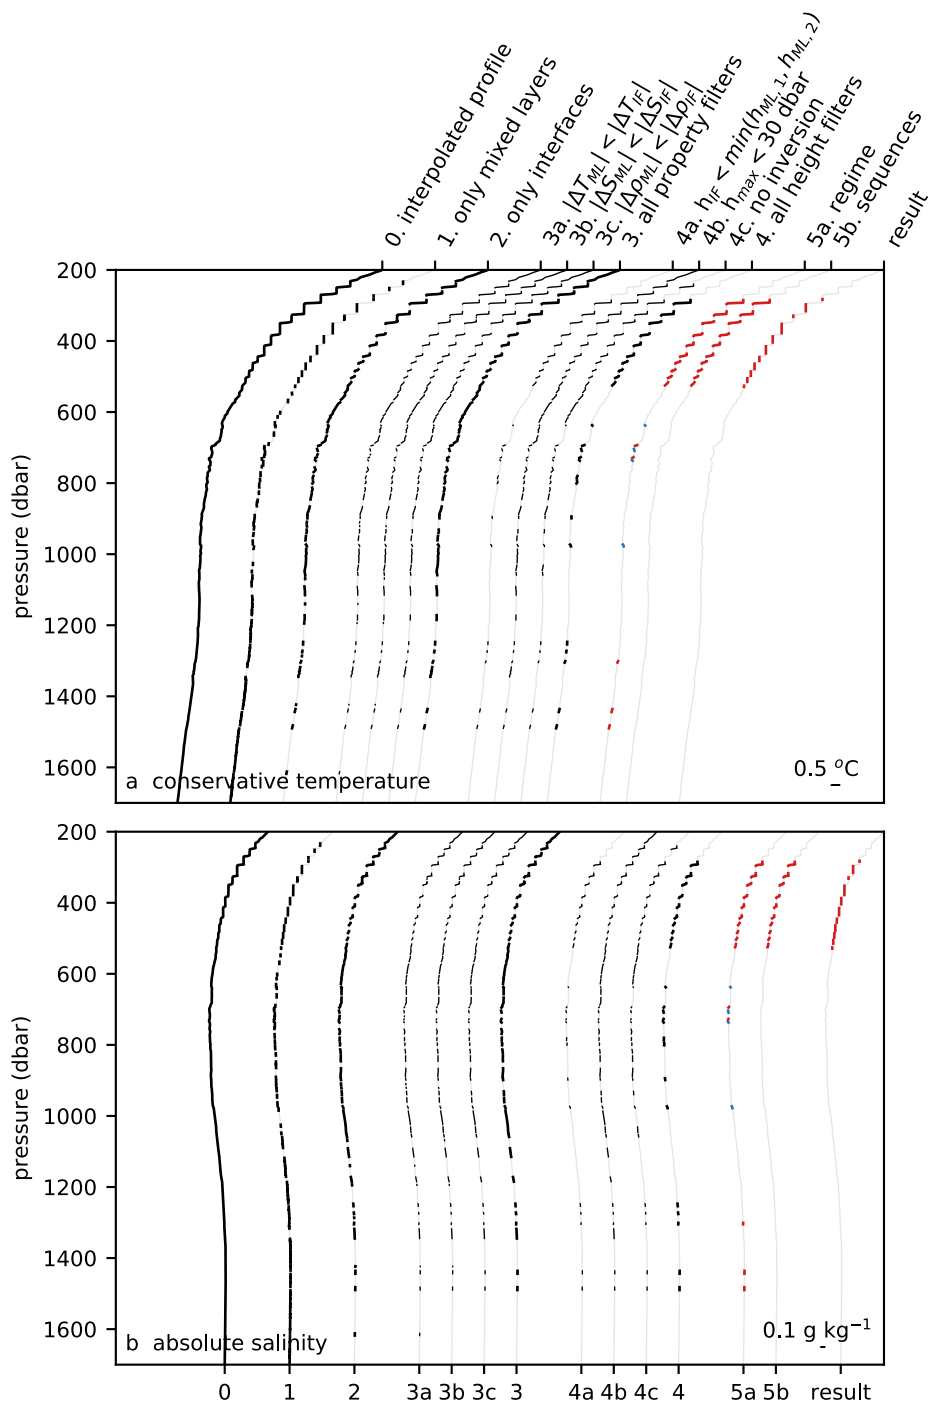

Figure A 3 as Figure A1, but for a profile in the western tropical North Atlantic. Original profile is taken from Argo float 4901478 at 53.3°W and 11.6°N on 9 August 2014.



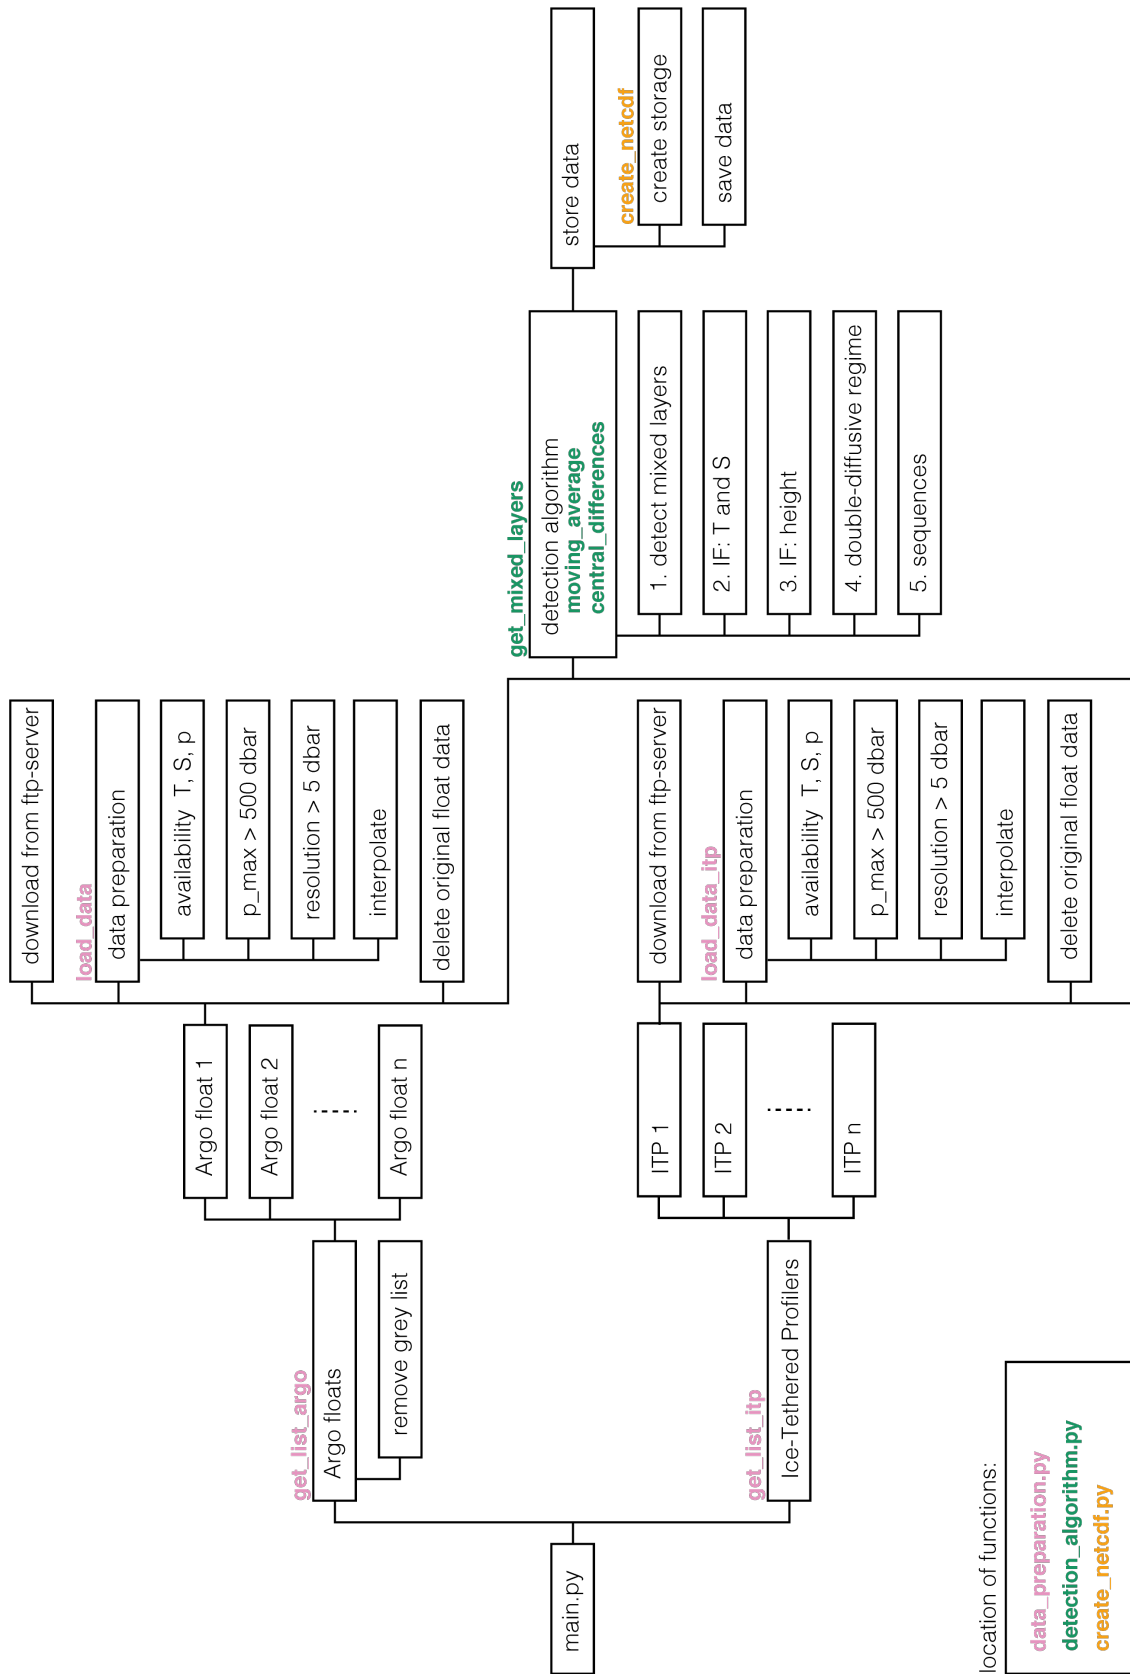

Figure A1 Structure of the software. Each step in the software is shown by a box. Whenever a particular step is contained inside a function, the name of the function is mentioned above the step. Details of the preprocessing of the data and the detection algorithm are discussed in Sections 2 and Section 3, respectively.
